# Supplementary material
Source: ML conference proceedings conference paper supplement (https://openreview.net/forum?id=suzMI2P1rT)
Supplement: supplementary_material [file attachment]

---

# Appendix of CEIL

---

Anonymous Author(s)

Affiliation

Address

email

## 1 Additional Derivation

(Repeat from the main paper.) To gain more insight into Equation 4 that captures the quality of IL (the degree of similarity to the expert data), we define  $D(\cdot, \cdot)$  as the sum of reverse KL and forward KL divergence, i.e.,  $D(q, p) = D_{\text{KL}}(q||p) + D_{\text{KL}}(p||q)$ , and derive an alternative form for Equation 4:

$$\arg \min_{\mathbf{z}^*} D(\pi_\theta(\boldsymbol{\tau}|\mathbf{z}^*), \pi_E(\boldsymbol{\tau})) = \arg \max_{\mathbf{z}^*} \underbrace{\mathcal{I}(\mathbf{z}^*; \boldsymbol{\tau}_E) - \mathcal{I}(\mathbf{z}^*; \boldsymbol{\tau}_\theta)}_{\mathcal{J}_{\text{MI}}} - \underbrace{D_{\text{KL}}(\pi_\theta(\boldsymbol{\tau}), \pi_E(\boldsymbol{\tau}))}_{\mathcal{J}_D},$$

where  $\mathcal{I}(\mathbf{x}; \mathbf{y})$  denotes the mutual information (MI) between  $\mathbf{x}$  and  $\mathbf{y}$ , which measures the predictive power of  $\mathbf{y}$  on  $\mathbf{x}$  (or vice-versa), the latent variables are defined as  $\boldsymbol{\tau}_E := \boldsymbol{\tau} \sim \pi_E(\boldsymbol{\tau})$ ,  $\boldsymbol{\tau}_\theta := \boldsymbol{\tau} \sim p(\mathbf{z}^*)\pi_\theta(\boldsymbol{\tau}|\mathbf{z}^*)$ , and  $\pi_\theta(\boldsymbol{\tau}) = \mathbb{E}_{\mathbf{z}^*} [\pi_\theta(\boldsymbol{\tau}|\mathbf{z}^*)]$ .

Below is our derivation:

$$\begin{aligned} & \min_{\mathbf{z}^*} D(\pi_\theta(\boldsymbol{\tau}|\mathbf{z}^*), \pi_E(\boldsymbol{\tau})) \\ &= \min_{\mathbf{z}^*} \mathbb{E}_{p(\mathbf{z}^*)} [D_{\text{KL}}(\pi_\theta(\boldsymbol{\tau}|\mathbf{z}^*)||\pi_E(\boldsymbol{\tau})) + D_{\text{KL}}(\pi_E(\boldsymbol{\tau})||\pi_\theta(\boldsymbol{\tau}|\mathbf{z}^*))] \\ &= \min_{\mathbf{z}^*} \mathbb{E}_{p(\mathbf{z}^*)\pi_\theta(\boldsymbol{\tau}|\mathbf{z}^*)} [\log \pi_\theta(\boldsymbol{\tau}|\mathbf{z}^*) - \log \pi_E(\boldsymbol{\tau})] \\ & \quad + \mathbb{E}_{p(\mathbf{z}^*)\pi_E(\boldsymbol{\tau})} [\log \pi_E(\boldsymbol{\tau}) - \log \pi_\theta(\boldsymbol{\tau}|\mathbf{z}^*)] \\ &= \min_{\mathbf{z}^*} \mathbb{E}_{p(\mathbf{z}^*)\pi_\theta(\boldsymbol{\tau}|\mathbf{z}^*)} \left[ \log \frac{p(\mathbf{z}^*|\boldsymbol{\tau})\pi_\theta(\boldsymbol{\tau})}{p(\mathbf{z}^*)} - \log \pi_E(\boldsymbol{\tau}) \right] \\ & \quad + \mathbb{E}_{p(\mathbf{z}^*)\pi_E(\boldsymbol{\tau})} \left[ \log \pi_E(\boldsymbol{\tau}) - \log \frac{p(\mathbf{z}^*|\boldsymbol{\tau})\pi_\theta(\boldsymbol{\tau})}{p(\mathbf{z}^*)} \right] \\ &= \min_{\mathbf{z}^*} \mathbb{E}_{p(\mathbf{z}^*)\pi_\theta(\boldsymbol{\tau}|\mathbf{z}^*)} \left[ \log \frac{p(\mathbf{z}^*|\boldsymbol{\tau})}{p(\mathbf{z}^*)} + \log \frac{\pi_\theta(\boldsymbol{\tau})}{\pi_E(\boldsymbol{\tau})} \right] - \mathbb{E}_{p(\mathbf{z}^*)\pi_E(\boldsymbol{\tau})} \left[ \log \frac{p(\mathbf{z}^*|\boldsymbol{\tau})}{p(\mathbf{z}^*)} + \log \frac{\pi_\theta(\boldsymbol{\tau})}{\pi_E(\boldsymbol{\tau})} \right] \\ &= \max_{\mathbf{z}^*} \mathcal{I}(\mathbf{z}^*; \boldsymbol{\tau}_E) - \mathcal{I}(\mathbf{z}^*; \boldsymbol{\tau}_\theta) - D_{\text{KL}}(\pi_\theta(\boldsymbol{\tau}), \pi_E(\boldsymbol{\tau})) + C, \end{aligned}$$

where  $\boldsymbol{\tau}_E := \boldsymbol{\tau} \sim \pi_E(\boldsymbol{\tau})$ ,  $\boldsymbol{\tau}_\theta := \boldsymbol{\tau} \sim p(\mathbf{z}^*)\pi_\theta(\boldsymbol{\tau}|\mathbf{z}^*)$ , and  $C$  is a constant.

## 2 More Comparisons and Ablation Studies

### 2.1 Offline Comparison on D4RL Expert Domain Dataset

In Table 1, we provide the normalized return of our method and baseline methods on the reward-free D4RL [4] expert dataset. Consistently, we can observe that CEIL achieves a significant improvement over the baseline methods in both *S-off-LfD* and *S-off-LfO* settings. Compared to the state-of-the-art offline IL baselines, CEIL also shows competitive results on the challenging cross-domain offline IL settings (*C-off-LfD* and *C-off-LfO*).

Table 1: Normalized scores (averaged over 30 trails for each task) on D4RL expert dataset. Scores within two points of the maximum score are highlighted. hop: Hopper-v2. hal: HalfCheetah-v2. wal: Walker2d-v2. ant: Ant-v2.

|                  |               | hop<br>expert | hal<br>expert | wal<br>expert | ant<br>expert | sum          |
|------------------|---------------|---------------|---------------|---------------|---------------|--------------|
| <i>S-off-LfD</i> | ORIL (TD3+BC) | 97.5          | 91.8          | 14.5          | 76.8          | 280.6        |
|                  | SQIL (TD3+BC) | 25.5          | 14.4          | 8.0           | 44.3          | 92.1         |
|                  | IQ-Learn      | 37.3          | 9.9           | 46.6          | 85.9          | 179.7        |
|                  | ValueDICE     | 65.6          | 2.9           | 28.2          | 90.5          | 187.1        |
|                  | DemoDICE      | 107.3         | 87.1          | 104.8         | 114.2         | 413.3        |
|                  | SMODICE       | 111.0         | 93.5          | 108.2         | 122.0         | <b>434.7</b> |
|                  | CEIL          | 106.0         | 96.0          | 115.6         | 117.8         | <b>435.4</b> |
| <i>S-off-LfO</i> | ORIL (TD3+BC) | 64.2          | 92.1          | 12.2          | 44.3          | 212.8        |
|                  | SMODICE       | 111.3         | 93.7          | 108.0         | 122.0         | <b>435.0</b> |
|                  | CEIL          | 103.3         | 96.8          | 110.0         | 126.4         | <b>436.5</b> |
| <i>C-off-LfD</i> | ORIL (TD3+BC) | 24.4          | 78.3          | 29.3          | 32.1          | 164.1        |
|                  | SQIL (TD3+BC) | 12.2          | 19.9          | 8.8           | 21.2          | 62.0         |
|                  | IQ-Learn      | 25.9          | 31.2          | 31.7          | 55.8          | 144.6        |
|                  | ValueDICE     | 18.6          | 9.8           | 8.3           | 22.3          | 59.0         |
|                  | DemoDICE      | 111.5         | 88.7          | 107.9         | 122.5         | 430.6        |
|                  | SMODICE       | 111.1         | 93.8          | 108.2         | 120.9         | <b>434.0</b> |
|                  | CEIL          | 105.8         | 97.1          | 108.6         | 112.2         | 423.7        |
| <i>C-off-LfO</i> | ORIL (TD3+BC) | 22.5          | 76.6          | 11.2          | 28.2          | 138.6        |
|                  | SMODICE       | 111.2         | 93.7          | 108.1         | 117.7         | 430.7        |
|                  | CEIL          | 113.0         | 90.1          | 108.7         | 125.2         | <b>437.0</b> |

Table 2: Normalized scores (*evaluated on the expert dataset* over 30 trails for each task) on 2 cross-domain offline IL settings: *C-off-LfD* and *C-off-LfO*. Scores within two points of the maximum score are highlighted. m: medium. mr: medium-replay. me: medium-expert. e: expert.

|                  |               | Hopper-v2   |      |       |       | HalfCheetah-v2 |      |      |      | sum          |
|------------------|---------------|-------------|------|-------|-------|----------------|------|------|------|--------------|
|                  |               | m           | mr   | me    | e     | m              | mr   | me   | e    |              |
| <i>C-off-LfD</i> | ORIL (TD3+BC) | 74.7        | 16.7 | 45.0  | 21.4  | 2.2            | 0.8  | -0.3 | -2.2 | 158.3        |
|                  | SQIL (TD3+BC) | 33.6        | 21.6 | 14.5  | 14.5  | 18.2           | 7.5  | 20.9 | 20.9 | 151.8        |
|                  | IQ-Learn      | 11.8        | 9.7  | 17.1  | 17.1  | 7.7            | 7.8  | 9.5  | 9.5  | 90.2         |
|                  | ValueDICE     | 49.5        | 24.2 | 55.7  | 49.3  | 32.2           | 32.9 | 38.7 | 28.7 | 311.2        |
|                  | DemoDICE      | 83.2        | 31.5 | 81.6  | 28.5  | 0.9            | -1.1 | -1.7 | -2.4 | 220.6        |
|                  | SMODICE       | 80.1        | 26.1 | 78.0  | 54.3  | 2.8            | -1.0 | 1.0  | -2.3 | 239.1        |
|                  | CEIL          | 87.4        | 74.3 | 81.2  | 82.4  | 44.0           | 30.4 | 25.0 | 17.1 | <b>441.9</b> |
| <i>C-off-LfO</i> | ORIL (TD3+BC) | 62.3        | 18.7 | 57.0  | 28.2  | 0.2            | 1.1  | -0.3 | -2.3 | 165.0        |
|                  | SMODICE       | 77.6        | 22.5 | 80.2  | 71.0  | 2.0            | -0.9 | 0.8  | -2.3 | 250.9        |
|                  | CEIL          | 56.4        | 58.6 | 56.7  | 65.2  | 5.5            | 36.5 | 5.0  | 5.0  | <b>288.7</b> |
|                  |               | Walker2d-v2 |      |       |       | Ant-v2         |      |      |      | sum          |
|                  |               | m           | mr   | me    | e     | m              | mr   | me   | e    |              |
| <i>C-off-LfD</i> | ORIL (TD3+BC) | 22.0        | 24.5 | 23.9  | 33.1  | 16.0           | 18.6 | 2.5  | 0.4  | 141.0        |
|                  | SQIL (TD3+BC) | 32.4        | 14.9 | 10.3  | 10.3  | 71.4           | 63.6 | 60.1 | 60.1 | 323.1        |
|                  | IQ-Learn      | 8.4         | 5.0  | 10.2  | 10.2  | 19.4           | 18.4 | 16.1 | 16.1 | 103.8        |
|                  | ValueDICE     | 31.7        | 21.9 | 22.9  | 27.7  | 70.5           | 68.5 | 69.3 | 68.5 | 380.9        |
|                  | DemoDICE      | 12.8        | 31.5 | 12.9  | 86.9  | 15.7           | 24.2 | 2.3  | 1.4  | 187.7        |
|                  | SMODICE       | 43.6        | 16.1 | 62.0  | 85.3  | 23.7           | 22.9 | 2.3  | -5.9 | 249.9        |
|                  | CEIL          | 102.8       | 94.8 | 101.9 | 100.7 | 82.0           | 77.0 | 76.4 | 79.8 | <b>715.3</b> |
| <i>C-off-LfO</i> | ORIL (TD3+BC) | 22.4        | 15.2 | 17.8  | 12.6  | 13.6           | 20.7 | 5.5  | -6.2 | 101.6        |
|                  | SMODICE       | 42.4        | 17.0 | 55.5  | 88.7  | 15.7           | 22.6 | 2.5  | -6.3 | 238.1        |
|                  | CEIL          | 67.9        | 12.0 | 68.4  | 50.8  | 31.7           | 57.0 | 18.0 | -1.9 | <b>304.0</b> |

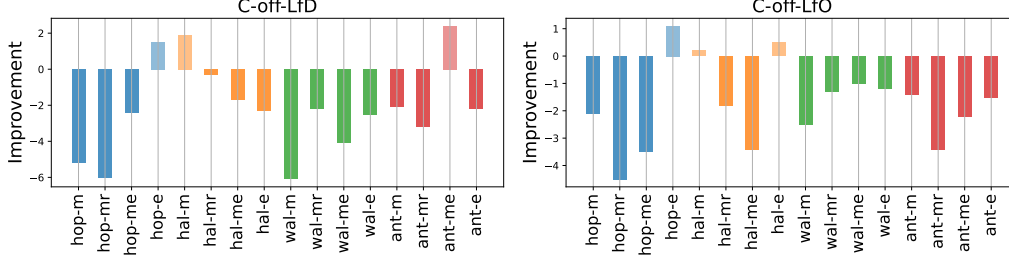

Figure 1: Normalized performance improvement (left:  $C\text{-off-LfD}$ , right:  $C\text{-off-LfO}$ ) when we ablate the cross-domain regularization (Equation 9 in the main paper) in cross-domain IL settings. We can observe the general trend (in 26 out of 32 tasks) that ablating the cross-domain regularization causes negative performance improvement. hop: Hopper-v2. hal: HalfCheetah-v2. wal: Walker2d-v2. ant: Ant-v2. m: medium. me: medium-expert. mr: medium-replay. e: expert.

## 2.2 Generalizability on Cross-domain Offline IL Settings

In the standard cross-domain IL setting, the goal is to extract expert-relevant information from the mismatched expert demonstrations/observations (expert domain) and to mimic such expert behaviors in the training environment (training domain). Thus, we validate the performance of the learned policy in the training environment (*i.e.*, the environment where the offline data was collected). Here, we also study the generalizability of the learned policy by evaluating the learned policy in the expert environment (*i.e.*, the environment where the mismatched expert data was collected). We provide the normalized scores (*evaluated in the expert domain*) in Table 2. We can find that across a range of cross-domain offline IL tasks, CEIL consistently demonstrates better (zero-shot) generalizability compared to baselines.

## 2.3 Ablating the Cross-domain Regularization

We now conduct ablation studies to evaluate the importance of cross-domain regularization in Equation 9 (in the main paper). In Figure 1, we provide the performance improvement when we ablate the cross-domain regularization in two cross-domain offline IL tasks ( $C\text{-off-LfD}$  and  $C\text{-off-LfO}$ ). We can find that in 26 out of 32 cross-domain tasks, ablating the regularization can cause performance to decrease (negative performance improvement), thus verifying the benefits of encouraging task-relevant embeddings.

## 2.4 Aggregate Results

According to Agarwal et al. [1], we report the aggregate statistics (for 16 offline IL tasks) in Figure 2. We can find that CEIL provides competitive performance consistently across a range of offline IL settings ( $S\text{-off-LfD}$ ,  $S\text{-off-LfO}$ ,  $C\text{-off-LfD}$ , and  $C\text{-off-LfO}$ ) and outperforms prior offline baselines.

## 2.5 Varying the Number of Expert Trajectories

As a complement to the experimental results in the main paper, we continue to compare the performance of CEIL and baselines on more tasks when we vary the number of expert trajectories. Considering offline IL settings, we provide the results in Table 3 for the number of expert trajectories of 5, 10, 15, and 20 respectively. We can find that when varying the number of expert behaviors, CEIL can still obtain higher scores compared to baselines, which is consistent with the findings in Figure 3 in the main paper.

## 2.6 Limitation (Failure Modes in Online LfO Setting)

Meanwhile, we find that in the online LfO settings, CEIL’s performance deteriorates severely on a few tasks, as shown in Figure 3 (Walker2d). In LfD (either on single-domain or on cross-domain IL) settings, CEIL can consistently achieve expert-level performance, but when migrating to LfO settings, CEIL suffers collapsing performance under the same number of environmental interactions.

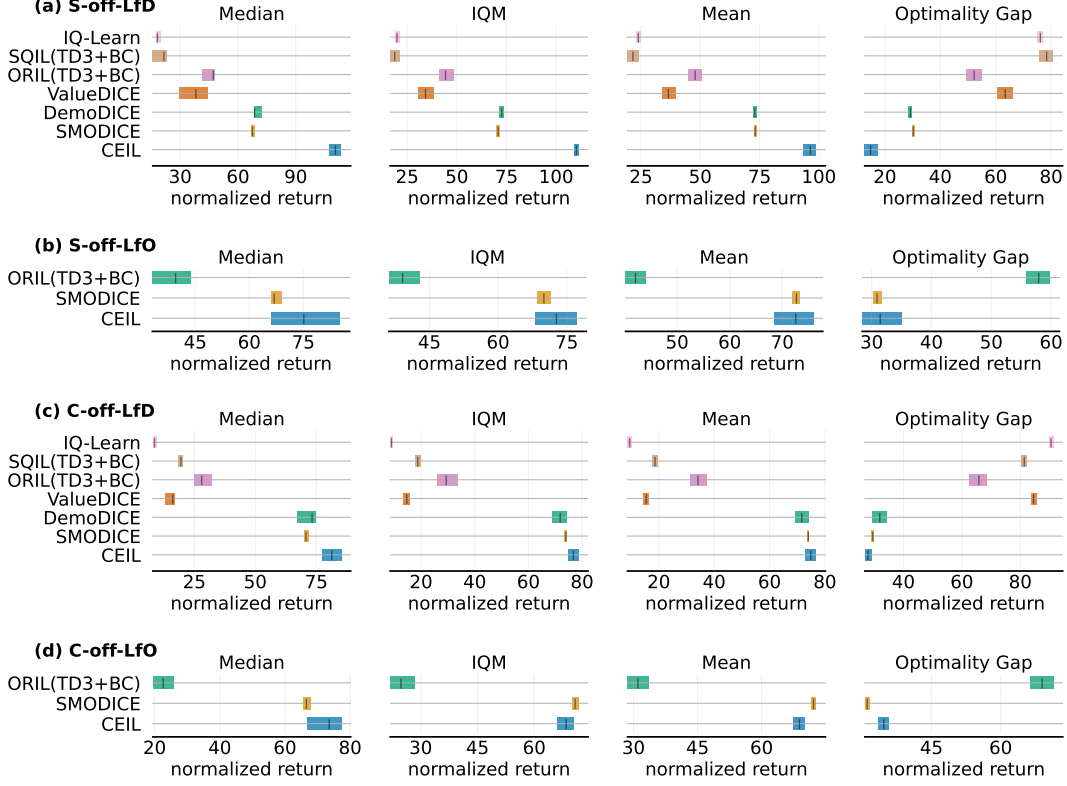

Figure 2: Aggregate median, IQM, mean, and optimality gap over 16 offline IL tasks. Higher median, higher IQM, and higher mean and lower optimality gap are better. The shaded bar shows 95% stratified bootstrap confidence intervals. We can see that CEIL achieves consistently better performance across a wide range of offline IL settings.

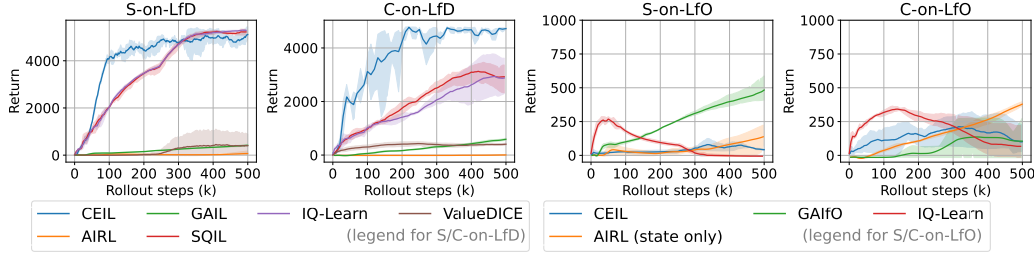

Figure 3: Return curves in Walker2d-v2 (from left to right: *S-on-LfD*, *C-on-LfD*, *S-on-LfO*, and *C-on-LfO*), where the shaded area represents a 95% confidence interval over 30 trails. We can see that CEIL consistently achieves expert-level performance in LfD (*S-on-LfD* and *C-on-LfD*) tasks. Due to the lack of explicit exploration in online LfO settings, CEIL exhibits drastic performance degradation (in *S-on-LfO* and *C-on-LfO*) under the same environmental interaction steps.

50 We believe that this is due to the lack of expert actions in LfO settings, which causes the agent to stay  
51 in the collapsed state region and therefore deteriorates performance. Thus, we believe a rich direction  
52 for future research is to explore the online exploration ability.

Table 3: Normalized scores (averaged over 30 trails for each task) when we vary the number of the expert demonstrations (#5, #10, #15, and #20). Scores within two points of the maximum score are highlighted

| Offline IL settings |               | Hopper-v2 |       |       | Halfcheetah-v2 |      |      | Walker2d-v2 |       |       | Ant-v2 |       |       | sum    |
|---------------------|---------------|-----------|-------|-------|----------------|------|------|-------------|-------|-------|--------|-------|-------|--------|
|                     |               | m         | mr    | me    | m              | mr   | me   | m           | mr    | me    | m      | mr    | me    |        |
| S-off-LfD #5        | ORIL (TD3+BC) | 42.1      | 26.7  | 51.2  | 45.1           | 2.7  | 79.6 | 44.1        | 22.9  | 38.3  | 25.6   | 24.5  | 6.0   | 408.8  |
|                     | SQIL (TD3+BC) | 45.2      | 27.4  | 5.9   | 14.5           | 15.7 | 11.8 | 12.2        | 7.2   | 13.6  | 20.6   | 23.6  | -5.7  | 192.0  |
|                     | IQ-Learn      | 17.2      | 15.4  | 21.7  | 6.4            | 4.8  | 6.2  | 13.1        | 10.6  | 5.1   | 22.8   | 27.2  | 18.7  | 169.2  |
|                     | ValueDICE     | 59.8      | 80.1  | 72.6  | 2.0            | 0.9  | 1.2  | 2.8         | 0.0   | 7.4   | 27.3   | 32.7  | 30.2  | 316.9  |
|                     | DemoDICE      | 50.2      | 26.5  | 63.7  | 41.9           | 38.7 | 59.5 | 66.3        | 38.8  | 101.6 | 82.8   | 68.8  | 112.4 | 751.2  |
|                     | SMODICE       | 54.1      | 34.9  | 64.7  | 42.6           | 38.4 | 63.8 | 62.2        | 40.6  | 55.4  | 86.0   | 69.7  | 112.4 | 724.7  |
|                     | CEIL          | 94.5      | 45.1  | 80.8  | 45.1           | 43.3 | 33.9 | 103.1       | 81.1  | 99.4  | 99.8   | 101.4 | 85.0  | 912.5  |
| S-off-LfD #10       | ORIL (TD3+BC) | 42.0      | 21.6  | 53.4  | 45.0           | 2.1  | 82.1 | 44.1        | 27.4  | 80.4  | 47.3   | 24.0  | 44.9  | 514.1  |
|                     | SQIL (TD3+BC) | 50.0      | 34.2  | 7.4   | 8.8            | 10.9 | 8.2  | 20.0        | 15.2  | 9.7   | 35.3   | 36.2  | 11.9  | 247.6  |
|                     | IQ-Learn      | 11.3      | 18.6  | 20.1  | 4.1            | 6.5  | 6.6  | 18.3        | 12.8  | 12.2  | 30.7   | 53.9  | 23.7  | 218.7  |
|                     | ValueDICE     | 56.0      | 64.1  | 54.2  | -0.2           | 2.6  | 2.4  | 4.7         | 4.0   | 0.9   | 31.4   | 72.3  | 49.5  | 341.8  |
|                     | DemoDICE      | 53.6      | 25.8  | 64.9  | 42.1           | 36.9 | 60.6 | 64.7        | 36.1  | 100.2 | 87.4   | 67.1  | 114.3 | 753.5  |
|                     | SMODICE       | 55.6      | 30.3  | 66.6  | 42.6           | 38.0 | 66.0 | 64.5        | 44.6  | 53.8  | 86.9   | 69.5  | 113.4 | 731.8  |
|                     | CEIL          | 113.2     | 53.0  | 96.3  | 64.0           | 43.6 | 44.0 | 120.4       | 82.3  | 104.2 | 119.3  | 70.0  | 90.1  | 1000.4 |
| S-off-LfD #15       | ORIL (TD3+BC) | 38.9      | 22.3  | 46.8  | 44.7           | 1.9  | 83.8 | 37.9        | 4.2   | 69.9  | 59.4   | 22.3  | 12.4  | 444.6  |
|                     | SQIL (TD3+BC) | 42.8      | 44.4  | 5.2   | 6.8            | 17.1 | 9.1  | 16.9        | 13.5  | 6.9   | 21.2   | 17.2  | 12.6  | 213.6  |
|                     | IQ-Learn      | 14.6      | 8.2   | 29.3  | 4.0            | 3.4  | 5.1  | 7.3         | 14.5  | 11.4  | 54.2   | 15.2  | 61.6  | 228.6  |
|                     | ValueDICE     | 66.3      | 58.3  | 53.6  | 2.3            | 2.3  | 1.2  | 5.2         | -0.1  | 17.0  | 45.2   | 72.0  | 74.3  | 397.8  |
|                     | DemoDICE      | 52.2      | 29.6  | 67.3  | 41.9           | 37.6 | 58.1 | 66.4        | 42.9  | 103.5 | 86.6   | 68.3  | 114.3 | 768.7  |
|                     | SMODICE       | 55.9      | 25.7  | 72.7  | 42.5           | 37.6 | 66.4 | 67.0        | 43.2  | 55.1  | 86.7   | 69.7  | 118.2 | 740.6  |
|                     | CEIL          | 116.4     | 56.7  | 103.7 | 80.4           | 43.0 | 43.8 | 120.3       | 84.8  | 103.8 | 126.8  | 87.0  | 90.6  | 1057.3 |
| S-off-LfD #20       | ORIL (TD3+BC) | 50.9      | 22.1  | 72.7  | 44.7           | 30.2 | 87.5 | 47.1        | 26.7  | 102.6 | 46.5   | 31.4  | 61.9  | 624.3  |
|                     | SQIL (TD3+BC) | 32.6      | 60.6  | 25.5  | 13.2           | 25.3 | 14.4 | 25.6        | 15.6  | 8.0   | 63.6   | 58.4  | 44.3  | 387.1  |
|                     | IQ-Learn      | 21.3      | 19.9  | 24.9  | 5.0            | 7.5  | 7.5  | 22.3        | 19.6  | 18.5  | 38.4   | 24.3  | 55.3  | 264.5  |
|                     | ValueDICE     | 73.8      | 83.6  | 50.8  | 1.9            | 2.4  | 3.2  | 24.6        | 26.4  | 44.1  | 79.1   | 82.4  | 75.2  | 547.5  |
|                     | DemoDICE      | 54.8      | 32.7  | 65.4  | 42.8           | 37.0 | 55.6 | 68.1        | 39.7  | 95.0  | 85.6   | 69.0  | 108.8 | 754.6  |
|                     | SMODICE       | 56.1      | 28.7  | 68.0  | 42.7           | 37.7 | 66.9 | 66.2        | 40.7  | 58.2  | 87.4   | 69.9  | 113.4 | 735.9  |
|                     | CEIL (ours)   | 110.4     | 103.0 | 106.8 | 40.0           | 30.3 | 63.9 | 118.6       | 110.8 | 117.0 | 126.3  | 122.0 | 114.3 | 1163.5 |

### 3 Implementation Details

#### 3.1 Imitation Learning Tasks

In our paper, we conduct experiments across a variety of IL problem domains: single/cross-domain IL, online/offline IL, and LfD/LfO IL settings. By arranging and combining these IL domains, we obtain 8 IL tasks in all: *S-on-LfD*, *S-on-LfO*, *S-off-LfD*, *S-off-LfO*, *C-on-LfD*, *C-on-LfO*, *C-off-LfD*, and *C-off-LfO*, where S/C denotes single/cross-domain IL, on/off denotes online/offline IL, and LfD/LfO denote learning from demonstrations/observations respectively.

***S-on-LfD***. We have access to a limited number of expert demonstrations and an online interactive training environment. The goal of *S-on-LfD* is to learn an optimal policy that mimics the provided demonstrations in the training environment.

***S-on-LfO***. We have access to a limited number of expert observations (state-only demonstrations) and an online interactive training environment. The goal of *S-on-LfO* is to learn an optimal policy that mimics the provided observations in the training environment.

***S-off-LfD***. We have access to a limited number of expert demonstrations and a large amount of pre-collected offline (reward-free) data. The goal of *S-off-LfD* is to learn an optimal policy that mimics the provided demonstrations in the environment in which the offline data was collected. Note that here *the environment* that was used to collect the expert demonstrations and *the environment* that was used to collect the offline data are the same environment.

***S-off-LfO***. We have access to a limited number of expert observations and a large amount of pre-collected offline (reward-free) data. The goal of *S-off-LfO* is to learn an optimal policy that mimics the provided observations in the environment in which the offline data was collected. Note that here *the environment* that was used to collect the expert observations and *the environment* that was used to collect the offline data are the same environment.

***C-on-LfD***. We have access to a limited number of expert demonstrations and an online interactive training environment. The goal of *C-on-LfD* is to learn an optimal policy that mimics the provided demonstrations in the training environment. Note that here *the environment* that was used to collect the expert demonstrations and *the online training environment* are **not** the same environment.

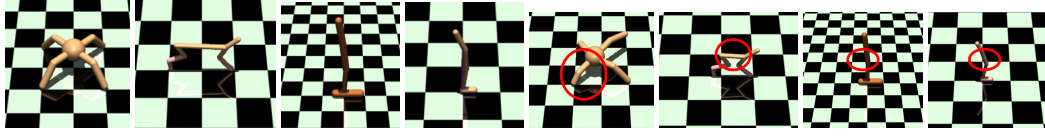

Figure 4: MuJoCo environments and our modified versions. From left to right: Ant-v2, HalfCheetah-v2, Hopper-v2, Walker2d-v2, our modified Ant-v2, our modified HalfCheetah-v2, our modified Hopper-v2, and our modified Walker2d-v2.

80 **C-on-LfO.** We have access to a limited number of expert observations (state-only demonstrations)  
 81 and an online interactive training environment. The goal of *C-on-LfO* is to learn an optimal policy  
 82 that mimics the provided observations in the training environment. Note that here *the environment*  
 83 that was used to collect the expert observations and *the online training environment* are **not the same**  
 84 *environment*.

85 **C-off-LfD.** We have access to a limited number of expert demonstrations and a large amount of  
 86 pre-collected offline (reward-free) data. The goal of *C-off-LfD* is to learn an optimal policy that  
 87 mimics the provided demonstrations in the environment in which the offline data was collected. Note  
 88 that here *the environment* that was used to collect the expert demonstrations and *the environment* that  
 89 was used to collect the offline data are **not the same environment**.

90 **C-off-LfO.** We have access to a limited number of expert observations and a large amount of pre-  
 91 collected offline (reward-free) data. The goal of *C-off-LfO* is to learn an optimal policy that mimics  
 92 the provided observations in the environment in which the offline data was collected. Note that here  
 93 *the environment* that was used to collect the expert observations and *the environment* that was used to  
 94 collect the offline data are **not the same environment**.

### 95 3.2 Online IL Environments, Offline IL Datasets, and One-shot tasks

96 Our experiments are conducted in four popular MuJoCo environments (Figure 4): Hopper-v2,  
 97 HalfCheetah-v2, Walker2d-v2, and Ant-v2. For offline IL tasks, we take the standard (reward-free)  
 98 D4RL dataset [4] (medium, medium-replay, medium-expert, and expert domains) as the offline  
 99 dataset. For cross-domain (online/offline) IL tasks, we collect the expert behaviors (demonstrations  
 100 or observations) on a modified MuJoCo environment. Specifically, we change the height of the  
 101 agent’s torso (as shown in Figure 4). We refer the reader to our code submission, which includes our  
 102 modified MuJoCo assets. For one-shot IL tasks, we train the policy only in the single-domain IL  
 103 settings (*S-on-LfD*, *S-on-LfO*, *S-off-LfD*, and *S-off-LfO*). Then we collect only one expert trajectory  
 104 in the modified MuJoCo environment, and roll out the fine-tuned/inferred policy in the modified  
 105 environment to test the one-shot performance.

106 **Collecting expert behaviors.** In our implementation, we use the publicly available rlkit<sup>1</sup> imple-  
 107 mentation of SAC to learn an expert policy and use the learned policy to collect expert behaviors  
 108 (demonstrations in LfD or observations in LfO).

### 109 3.3 CEIL Implementation Details

110 **Trajectory self-consistency loss.** To learn the embedding function  $f_\phi$  and a corresponding contextual  
 111 policy  $\pi_\theta(\mathbf{a}|\mathbf{s}, \mathbf{z})$ , we minimize the following trajectory self-consistency loss:

$$\pi_\theta, f_\phi = \min_{\pi_\theta, f_\phi} -\mathbb{E}_{\tau_{1:T} \sim \mathcal{D}(\tau_{1:T})} \mathbb{E}_{(\mathbf{s}, \mathbf{a}) \sim \tau_{1:T}} [\log \pi_\theta(\mathbf{a}|\mathbf{s}, f_\phi(\tau_{1:T}))],$$

112 where  $\tau_{1:T}$  denotes a trajectory segment with window size of  $T$ . In the online setting, we sample  
 113 trajectory  $\tau$  from the experience replay buffer  $\mathcal{D}(\tau)$ ; in the offline setting, we sample trajectory  $\tau$   
 114 directly from the given offline data  $\mathcal{D}(\tau)$ . Meanwhile, if we can access the expert actions (*i.e.*, LfD  
 115 settings), we also incorporate the expert demonstrations into the empirical expectation (*i.e.*, storing  
 116 the expert demonstrations into the online/offline experience  $\mathcal{D}(\tau)$ ).

117 In our implementation, we use a 4-layer MLP (with ReLU activation) to encode the tra-  
 118 jectory  $\tau_{1:T}$  and a 4-layer MLP (with ReLU activation) to predict the action respectively.  
 119 To regularize the learning of the encoder function  $f_\phi$ , we additionally introduce a decoder

<sup>1</sup><https://github.com/rail-berkeley/rlkit>.

network (4-layer MLP with ReLU activation)  $\pi'_\theta(s'|s, f_\phi(\tau_{1:T}))$  to predict the next states:  
 $\min_{\pi'_\theta, f_\phi} -\mathbb{E}_{\tau_{1:T} \sim \mathcal{D}(\tau_{1:T})} \mathbb{E}_{(s, a, s') \sim \tau_{1:T}} [\log \pi'_\theta(s'|s, f_\phi(\tau_{1:T}))]$ . Further, to circumvent issues of  
"posterior collapse" [15], we encourage learning quantized latent embeddings. In a similar spirit  
to VQ-VAE [15], we incorporate ideas from vector quantization (VQ) and introduce the following  
regularization:  $\min_{f_\phi} \|\text{sg}[z_e(\tau_{1:T})] - e\|^2 + \|z_e(\tau_{1:T}) - \text{sg}[e]\|^2$ , where  $e$  is a dictionary of vector  
quantization embeddings (we set the size of this embedding dictionary to be 4096),  $z_e(\tau_{1:T})$  is  
defined as the nearest dictionary embedding to  $f_\phi(\tau_{1:T})$ , and  $\text{sg}[\cdot]$  denotes the stop-gradient operator.

**Out-level embedding inference.** In Section 4.2 (main paper), we approximate  $\mathcal{J}_{\text{MI}}$  with  $\mathcal{J}_{\text{MI}(f_\phi)} \triangleq$   
 $\mathbb{E}_{p(\mathbf{z}^*) \pi_E(\tau_E) \pi_\theta(\tau_\theta | \mathbf{z}^*)} [-\|\mathbf{z}^* - f_\phi(\tau_E)\|^2 + \|\mathbf{z}^* - f_\phi(\tau_\theta)\|^2]$ , where we replace the mutual infor-  
mation with  $-\|\mathbf{z}^* - f_\phi(\tau)\|^2$  by leveraging the learned embedding function  $f_\phi$ . Empirically, we  
find that we can ignore the second loss  $\|\mathbf{z}^* - f_\phi(\tau_\theta)\|^2$ , and directly conduct outer-level embedding  
inference with  $\max_{\mathbf{z}^*, f_\phi} \mathbb{E}_{p(\mathbf{z}^*) \pi_E(\tau_E)} [-\|\mathbf{z}^* - f_\phi(\tau_E)\|^2]$ . Meanwhile, this simplification makes  
the support constraints ( $\mathcal{R}(\mathbf{z}^*)$  in Equation 7 in the main paper) for the offline OOD issues naturally  
satisfied, since  $\max_{\mathbf{z}^*} \mathbb{E}_{p(\mathbf{z}^*) \pi_E(\tau_E)} [-\|\mathbf{z}^* - f_\phi(\tau_E)\|^2]$  and  $\min_{\mathbf{z}^*} \mathcal{R}(\mathbf{z}^*)$  are equivalent.

**Cross-domain IL regularization.** To encourage  $f_\phi$  to capture the task-relevant embeddings  
and ignore the domain-specific factors, we set the regularization  $\mathcal{R}(f_\phi)$  in Equation 5 to be:  
 $\mathcal{R}(f_\phi) = \mathcal{I}(f_\phi(\tau); \mathbf{n})$ , where we couple each trajectory  $\tau$  in  $\{\tau_E\} \cup \{\tau_{E'}\}$  with a label  $\mathbf{n} \in \{\mathbf{0}, \mathbf{1}\}$ ,  
indicating whether it is noised. In our implementation, we apply MINE [2] to estimate the  
mutual information and conduct encoder regularization. Specifically, we estimate  $\mathcal{I}(\mathbf{z}; \mathbf{n})$  with  
 $\hat{\mathcal{I}}(\mathbf{z}; \mathbf{n}) := \sup_\delta \mathbb{E}_{p(\mathbf{z}, \mathbf{n})} [f_\delta(\mathbf{z}, \mathbf{n})] - \log \mathbb{E}_{p(\mathbf{z}) p(\mathbf{n})} [\exp(f_\delta(\mathbf{z}, \mathbf{n}))]$  and regularize the encoder  $f_\phi$   
with  $\max_{f_\phi} \hat{\mathcal{I}}(f_\phi(\tau); \mathbf{n})$ , where we model  $f_\delta$  with a 4-layer MLP (using ReLU activations).

**Hyper-parameters.** In Table 4, we list the hyper-parameters used in the experiments.

Table 4: CEIL hyper-parameters.

| Parameter                                 | Value                                                           |
|-------------------------------------------|-----------------------------------------------------------------|
| size of the embedding dictionary          | 4096                                                            |
| size of the embedding dimension           | 16                                                              |
| trajectory window size                    | 2                                                               |
| encoder: optimizer                        | Adam                                                            |
| encoder: learning rate                    | 3e-4                                                            |
| encoder: learning rate scheduler          | CosineAnnealingWarmRestarts(T_0 = 1000, T_mult=1, eta_min=1e-5) |
| encoder: number of hidden layers          | 4                                                               |
| encoder: number of hidden units per layer | 512                                                             |
| encoder: nonlinearity                     | ReLU                                                            |
| policy: optimizer                         | Adam                                                            |
| policy: learning rate                     | 3e-4                                                            |
| policy: learning rate scheduler           | CosineAnnealingWarmRestarts(T_0 = 1000, T_mult=1, eta_min=1e-5) |
| policy: number of hidden layers           | 4                                                               |
| policy: number of hidden units per layer  | 512                                                             |
| policy: nonlinearity                      | ReLU                                                            |
| decoder: optimizer                        | Adam                                                            |
| decoder: learning rate                    | 3e-4                                                            |
| decoder: learning rate scheduler          | CosineAnnealingWarmRestarts(T_0 = 1000, T_mult=1, eta_min=1e-5) |
| decoder: number of hidden layers          | 4                                                               |
| decoder: number of hidden units per layer | 512                                                             |
| decoder: nonlinearity                     | ReLU                                                            |

Table 5: Baseline methods and their code-bases.

| Baselines         | Code-bases                                                                                                                                                        |
|-------------------|-------------------------------------------------------------------------------------------------------------------------------------------------------------------|
| GAIL, GAIfo, AIRL | <a href="https://github.com/HumanCompatibleAI/imitation">https://github.com/HumanCompatibleAI/imitation</a>                                                       |
| SAIL              | <a href="https://github.com/FangchenLiu/SAIL">https://github.com/FangchenLiu/SAIL</a>                                                                             |
| IQ-Learn, SQIL    | <a href="https://github.com/Div99/IQ-Learn">https://github.com/Div99/IQ-Learn</a>                                                                                 |
| ValueDICE         | <a href="https://github.com/google-research/google-research/tree/master/value_dice">https://github.com/google-research/google-research/tree/master/value_dice</a> |
| DemoDICE          | <a href="https://github.com/KAIST-AILab/imitation-dice">https://github.com/KAIST-AILab/imitation-dice</a>                                                         |
| SMODICE, ORIL     | <a href="https://github.com/JasonMa2016/SMODICE">https://github.com/JasonMa2016/SMODICE</a>                                                                       |

### 3.4 Baselines Implementation Details

We summarize our code-bases of our baseline implementations in Table 5 and describe each baseline as follows:

**Generative Adversarial Imitation Learning (GAIL).** GAIL [8] is a GAN-based online LfD method that trains a policy (generator) to confuse a discriminator trained to distinguish between generated transitions and expert transitions. While the goal of the discriminator is to maximize the objective below, the policy is optimized via an RL algorithm to match the expert occupancy measure (minimize the objective below):

$$\mathcal{J}(\pi, D) = \mathbb{E}_{\pi} [\log(D(s, a))] + \mathbb{E}_{\pi_E} [1 - \log(D(s, a))] - \lambda H(\pi).$$

We used the implementation by Gleave et al. [7] on the GitHub page<sup>2</sup>, where there are two modifications introduced with respect to the original paper: 1) a higher output of the discriminator represents better, 2) PPO is used to optimize the policy instead of TRPO.

**Generative Adversarial Imitation from Observations (GAIfO).** GAIfO [14] is an online LfO method that applies the principle of GAIL and utilizes a state-only discriminator to judge whether the generated trajectory matches the expert trajectory in terms of states. We provide the objective of GAIfO as follows:

$$\mathcal{J}(\pi, D) = \mathbb{E}_{\pi} [\log(D(s, s'))] + \mathbb{E}_{\pi_E} [1 - \log(D(s, s'))] - \lambda H(\pi).$$

Based on the implementation of GAIL, we implement GAIfO by changing the input of the discriminator to state transitions.

**Adversarial Inverse Reinforcement Learning (AIRL).** AIRL [3] is an online LfD/LfO method using an adversarial learning framework similar to GAIL. It modifies the form of the discriminator to explicitly disentangle the task-relevant information from the transition dynamics. To make the policy more generalized and less sensitive to dynamics, AIRL proposes to learn a parameterized reward function using the output of the discriminator:

$$\begin{aligned} f_{\theta, \phi}(s, a, s') &= g_{\theta}(s, a) + \lambda h_{\phi}(s') - h_{\phi}(s), \\ D_{\theta, \phi}(s, a, s') &= \frac{\exp(f_{\theta, \phi}(s, a, s'))}{\exp(f_{\theta, \phi}(s, a, s')) + \pi(a|s)}. \end{aligned}$$

Similarly to GAIL, we used the code provided by Gleave et al. [7], and the RL algorithm is also PPO.

**State Alignment-based Imitation Learning (SAIL).** SAIL [11] is an online LfO method capable of solving cross-domain tasks. SAIL aims to minimize the divergence between the policy rollout and the expert trajectory from both local and global perspectives: 1) locally, a KL divergence between the policy action and the action predicted by a state planner and an inverse dynamics model, 2) globally, a Wasserstein divergence of state occupancy between the policy and the expert. The policy is optimized using:

$$\begin{aligned} \mathcal{J}(\pi) &= -D_{\mathcal{W}}(\pi(s) \| \pi_E(s)) - \lambda D_{KL}(\pi(\cdot | s_t) \| \pi_E(\cdot | s_t)) \\ &= \mathbb{E}_{\pi(s_t, a_t, s_{t+1})} \left( \sum_{t=1}^T \frac{D(s_{t+1}) - \mathbb{E}_{\pi_E(s)} D(s)}{T} \right) - \lambda D_{KL} \left( \pi(\cdot | s_t) \| g_{\text{inv}}(\cdot | s_t, f(s_t)) \right), \end{aligned}$$

where  $D$  is a state-based discriminator trained via  $\mathcal{J}(D) = \mathbb{E}_{\pi_E} [D(s)] - \mathbb{E}_{\pi} [D(s)]$ ,  $f$  is the pretrained VAE-based state planner, and  $g_{\text{inv}}$  is the inverse dynamics model trained by supervised regression.

In the online setting, we use the official implementation published by the authors<sup>3</sup>, where SAIL is optimized using PPO with the reward definition:  $r(s_t, s_{t+1}) = \frac{1}{T} [D(s_{t+1}) - \mathbb{E}_{\pi_E(s)} D(s)]$ . Besides, we further implement SAIL in the offline setting by using TD3+BC [5] to maximize the reward defined above.

In our experiments, we empirically discover that SAIL is computationally expensive. While SAIL is able to learn tasks in the typical IL setting (*S-on-LfD*), our early experimental results find that

<sup>2</sup><https://github.com/HumanCompatibleAI/imitation>

<sup>3</sup><https://github.com/FangchenLiu/SAIL>



180 SAIL(TD3+BC) with heavy hyperparameter tuning failed on the offline setting. This indicates that  
 181 SAIL is rather sensitive to the dataset composition, which also coincides with the results gathered  
 182 in Ma et al. [12]. Thus, we do not include SAIL in our comparison results.

183 **Soft-Q Imitation Learning (SQIL).** SQIL [13] is a simple but effective single-domain LfD IL  
 184 algorithm that is easy to implement with both online and offline Q-learning algorithms. The main  
 185 idea of SQIL is to give sparse rewards (+1) only to those expert transitions and zero rewards (0) to  
 186 those experiences in the replay buffer. The Q-function of SQIL is updated using the squared soft  
 187 Bellman Error:

$$\delta^2(\mathcal{D}, r) \triangleq \frac{1}{|\mathcal{D}|} \sum_{(s,a,s') \in \mathcal{D}} \left( Q(s,a) - \left( r + \gamma \log \left( \sum_{a' \in \mathcal{A}} \exp(Q(s',a')) \right) \right) \right)^2.$$

188 The overall objective of the Q-function is to maximize the following objective:

$$\mathcal{J}(Q) = -\delta^2(\mathcal{D}_E, 1) - \delta^2(\mathcal{D}_\pi, 0).$$

189 In our experiments, the online imitation policy is optimized using SAC which is also used in the  
 190 original paper. To make a fair comparison among the offline IL baselines, the offline policy is  
 191 optimized via TD3+BC.

192 **Offline Reinforced Imitation Learning (ORIL).** ORIL [16] is an offline single-domain IL method  
 193 that solves both LfD and LfO tasks. To relax the hard-label assumption (like the sparse rewards  
 194 made in SQIL), ORIL treats the experiences stored in the replay buffer as unlabelled data that could  
 195 potentially include both successful and failed trajectories. More specifically, ORIL aims to train a  
 196 reward function to distinguish between the expert and the suboptimal data without explicitly knowing  
 197 the negative labels. By incorporating Positive-unlabeled learning (PU-learning), the objective of the  
 198 reward model can be written as follows (for the LfD setting):

$$\mathcal{J}(R) = \eta \mathbb{E}_{\pi_E(s,a)} [\log(R(s,a))] + \mathbb{E}_{\pi(s,a)} [\log(1 - R(s,a))] - \eta \mathbb{E}_{\pi_E(s,a)} [\log(1 - R(s,a))],$$

199 where  $\eta$  is the relative proportion of the expert data and we set it as 0.5 throughout our experiments.  
 200 In the original paper, the policy learning algorithm of ORIL is Critic Regularized Regression (CRR),  
 201 while in this paper, we implemented ORIL using TD3+BC for fair comparisons. Besides, we adapted  
 202 ORIL to the LfO setting by learning a state-only reward function:

$$\mathcal{J}(R) = \eta \mathbb{E}_{\pi_E(s,s')} [\log(R(s,s'))] + \mathbb{E}_{\pi(s,s')} [\log(1 - R(s,s'))] - \eta \mathbb{E}_{\pi_E(s,s')} [\log(1 - R(s,s'))].$$

203 **Inverse soft-Q learning (IQ-Learn).** IQ-Learn [6] is an IRL-based method that can solve IL tasks in  
 204 the online/offline and LfD/LfO settings. It proposes to directly learn a Q-function from demonstrations  
 205 and avoid the intermediate step of reward learning. Unlike GAIL optimizing a min-max objective  
 206 defined in the reward-policy space, IQ-Learn solves the expert matching problem directly in the  
 207 policy-Q space. The Q-function is trained to maximize the objective:

$$\mathbb{E}_{\pi_E(s,a,s')} [Q(s,a) - \gamma V^\pi(s')] - \mathbb{E}_{\pi(s,a,s')} [Q(s,a) - \gamma V^\pi(s')] - \psi(r),$$

208 where  $V^\pi(s) \triangleq \mathbb{E}_{a \sim \pi(\cdot|s)} [Q(s,a) - \log \pi(a|s)]$ ,  $\psi(r)$  is a regularization term calculated over the  
 209 expert distribution. Then, the policy is learned by SAC.

210 We use the code provided in the official IQ-learn repository<sup>4</sup> and reproduce the online-LfD results  
 211 reported in the original paper. For online tasks, we empirically find that penalizing the Q-value on the  
 212 initial states gives the best and most stabilized performance. The learning objective of the Q-function  
 213 for the online tasks is:

$$\mathcal{J}(Q) = \mathbb{E}_{\pi_E(s,a,s')} [Q(s,a) - \gamma V^\pi(s')] - (1 - \gamma) \mathbb{E}_{\rho_0} [V^\pi(s_0)] - \psi(r).$$

214 In the offline setting, we find that using the above objective easily leads to an overfitting issue, causing  
 215 collapsed performance. Thus, we follow the instruction provided in the paper and only penalize the  
 216 expert samples:

$$\begin{aligned} \mathcal{J}(Q) &= \mathbb{E}_{\pi_E(s,a,s')} [Q(s,a) - \gamma V^\pi(s')] - \mathbb{E}_{\pi_E(s,a,s')} [V^\pi(s) - \gamma V^\pi(s')] - \psi(r) \\ &= \mathbb{E}_{\pi_E(s,a,s')} [Q(s,a) - V^\pi(s)] - \psi(r). \end{aligned}$$

<sup>4</sup><https://github.com/Div99/IQ-Learn>

217 **Imitation Learning via Off-Policy Distribution Matching (ValueDICE).** ValueDICE [10] is a  
 218 DICE-based<sup>5</sup> LfD algorithm which minimizes the divergence of state-action distributions between  
 219 the policy and the expert. In contrast to the state-conditional distribution of actions  $\pi(\cdot|s)$  used in the  
 220 above methods, the state-action distribution,  $d^\pi(s, a) : \mathcal{S} \times \mathcal{A} \rightarrow [0, 1]$ , can uniquely characterize a  
 221 one-to-one correspondence,

$$d^\pi(s, a) \triangleq (1 - \gamma) \sum_{t=0}^{\infty} \gamma^t \Pr(s_t = s, a_t = a | s_0 \sim \rho_0, a_t \sim \pi(s_t), s_{t+1} \sim P(s_t, a_t)).$$

222 Thus, the plain expert matching objective can be reformulated and expressed in the Donsker-Varadhan  
 223 representation:

$$\begin{aligned} \mathcal{J}(\pi) &= -D_{KL}(d^\pi(s, a) \| d^{\pi_E}(s, a)) \\ &= \min_{x: \mathcal{S} \times \mathcal{A} \rightarrow \mathbb{R}} \log \mathbb{E}_{(s, a) \sim d^{\pi_E}} [\exp(x(s, a))] - \mathbb{E}_{(s, a) \sim d^\pi} [x(s, a)]. \end{aligned}$$

224 The objective above can be expanded further by defining  $x(s, a) = v(s, a) - \mathcal{B}^\pi v(s, a)$  and using a  
 225 zero-reward Bellman operator  $\mathcal{B}^\pi$  to derive the following (adversarial) objective:

$$\mathcal{J}_{DICE}(\pi, v) = \log \mathbb{E}_{(s, a) \sim d^{\pi_E}} [\exp(v(s, a) - \mathcal{B}^\pi v(s, a))] - (1 - \gamma) \mathbb{E}_{s_0 \sim \rho_0, a_0 \sim \pi(\cdot|s_0)} [v(s_0, a_0)].$$

226 We use the official Tensorflow implementation<sup>6</sup> in our experiments. In the online setting, the rollouts  
 227 collected are used as an additional replay regularization. The overall objective in the online setting is:

$$\begin{aligned} &\mathcal{J}_{DICE}^{mix}(\pi, v) \\ &= -D_{KL}((1 - \alpha)d^\pi(s, a) + \alpha d^{RB}(s, a) \| (1 - \alpha)d^{\pi_E}(s, a) + \alpha d^{RB}(s, a)) \\ &= \log \mathbb{E}_{(s, a) \sim d^{mix}} [\exp(v(s, a) - \mathcal{B}^\pi v(s, a))] - (1 - \alpha)(1 - \gamma) \mathbb{E}_{s_0 \sim \rho_0, a_0 \sim \pi(\cdot|s_0)} [v(s_0, a_0)] \\ &\quad - \alpha \mathbb{E}_{(s, a) \sim d^{RB}} [v(s, a) - \mathcal{B}^\pi v(s, a)], \end{aligned}$$

228 where  $d^{mix} \triangleq (1 - \alpha)d^\pi + \alpha d^{RB}$  and  $\alpha$  is a non-negative regularization coefficient (we set  $\alpha$  as  
 229 0.1 following the specification of the paper).

230 In the offline setting, ValueDICE only differs in the source of sampling data. We change the online  
 231 replay buffer to the offline pre-collected dataset.

232 **Offline Imitation Learning with Supplementary Imperfect Demonstrations (DemoDICE).**

233 DemoDICE [9] is a DICE-based offline LfD method that assumes to have access to an offline dataset  
 234 collected by a behavior policy  $\pi_\beta$ . Using this supplementary dataset, the expert matching objective of  
 235 DemoDICE is instantiated over ValueDICE:

$$-D_{KL}(d^\pi(s, a) \| d^{\pi_E}(s, a)) - \alpha D_{KL}(d^\pi(s, a) \| d^{\pi_\beta}(s, a)),$$

236 where  $\alpha$  is a positive weight for the constraint.

237 The above optimization objective can be transformed into three tractable components: 1) a reward  
 238 function  $r(s, a)$  derived by pre-training a binary discriminator  $D : \mathcal{S} \times \mathcal{A} \rightarrow [0, 1]$ :

$$\begin{aligned} r(s, a) &= -\log\left(\frac{1}{D^*(s, a)} - 1\right), \\ D^*(s, a) &= \arg \max_D \mathbb{E}_{d^{\pi_E}} [\log D(s, a)] + \mathbb{E}_{d^{\pi_\beta}} [\log(1 - D(s, a))], \end{aligned}$$

239 2) a value function optimization objective:

$$\mathcal{J}(v) = -(1 - \gamma) \mathbb{E}_{s \sim \rho_0} [v(s)] - (1 + \alpha) \log \mathbb{E}_{(s, a) \sim d^{\pi_\beta}} \left[ \exp\left(\frac{r(s, a) + \mathbb{E}_{s' \sim P(s, a)}(v(s')) - v(s)}{1 + \alpha}\right) \right],$$

240 and 3) a policy optimization step:

$$\begin{aligned} \mathcal{J}(\pi) &= \mathbb{E}_{(s, a) \sim d^{\pi_\beta}} [v^*(s, a) \log \pi(a|s)], \\ v^*(s, a) &= \arg \max_v \mathcal{J}(v). \end{aligned}$$

<sup>5</sup>DICE refers to stationary DIstribution Estimation Correction

<sup>6</sup>[https://github.com/google-research/google-research/tree/master/value\\_dice](https://github.com/google-research/google-research/tree/master/value_dice)

241 We report the offline results using the official Tensorflow implementation<sup>7</sup>.

242 **State Matching Offline Distribution Correction Estimation (SMODICE).** SMODICE [12] pro-  
 243 poses to solve offline IL tasks in LfO and cross-domain settings and it optimizes the following state  
 244 occupancy objective:

$$-D_{KL}(d^\pi(s) \| d^{\pi_E}(s)).$$

245 To incorporate the offline dataset, SMODICE derives an f-divergence regularized state-occupancy  
 246 objective:

$$\mathbb{E}_{s \sim d^\pi(s)} \left[ \log \left( \frac{d^{\pi_\beta}(s)}{d^{\pi_E}(s)} \right) \right] + -D_f(d^\pi(s, a) \| d^{\pi_\beta}(s, a)).$$

247 Intuitively, the first term can be interpreted as matching the offline states towards the expert states,  
 248 while the second regularization term constrains the policy close to the offline distribution of state-  
 249 action occupancy. Similarly, we can divide the objective into three steps: 1) deriving a state-based  
 250 reward by learning a state-based discriminator:

$$r(s, a) = -\log \left( \frac{1}{D^*(s)} - 1 \right),$$

$$D^*(s, a) = \arg \max_D = \mathbb{E}_{d^{\pi_E}} [\log D(s)] + \mathbb{E}_{d^{\pi_\beta}} [\log(1 - D(s))],$$

251 2) learning a value function using the learned reward:

$$\mathcal{J}(v) = -(1 - \gamma) \mathbb{E}_{s \sim \rho_0} [v(s)] - \log \mathbb{E}_{(s, a) \sim d^{\pi_\beta}} [f_*(r(s, a) + \mathbb{E}_{s' \sim P(s, a)}(v(s')) - v(s))],$$

252 and 3) training the policy via weighted regression:

$$\mathcal{J}(\pi) = \mathbb{E}_{(s, a) \sim d^{\pi_\beta}} [f'_*(r(s, a) + \mathbb{E}_{s' \sim P(s, a)}(v^*(s')) - v^*(s)) \log \pi(a|s)],$$

$$v^*(s, a) = \arg \max_v \mathcal{J}(v),$$

253 where  $f_*$  is the Fenchel conjugate of f-divergence (please refer to Ma et al. [12] for more details).

254 We conduct experiments using the official Pytorch implementation<sup>8</sup>, where the f-divergence used is  
 255  $\mathcal{X}^2$ -divergence. On the LfD tasks, we change the input of the discriminator to state-action pairs.

## 256 References

- 257 [1] Rishabh Agarwal, Max Schwarzer, Pablo Samuel Castro, Aaron C Courville, and Marc Belle-  
 258 mare. Deep reinforcement learning at the edge of the statistical precipice. *Advances in neural*  
 259 *information processing systems*, 34:29304–29320, 2021.
- 260 [2] Mohamed Ishmael Belghazi, Aristide Baratin, Sai Rajeswar, Sherjil Ozair, Yoshua Bengio,  
 261 Aaron Courville, and R Devon Hjelm. Mine: mutual information neural estimation. *arXiv*  
 262 *preprint arXiv:1801.04062*, 2018.
- 263 [3] Justin Fu, Katie Luo, and Sergey Levine. Learning robust rewards with adversarial inverse  
 264 reinforcement learning. *arXiv preprint arXiv:1710.11248*, 2017.
- 265 [4] Justin Fu, Aviral Kumar, Ofir Nachum, George Tucker, and Sergey Levine. D4rl: Datasets for  
 266 deep data-driven reinforcement learning. *arXiv preprint arXiv:2004.07219*, 2020.
- 267 [5] Scott Fujimoto and Shixiang Shane Gu. A minimalist approach to offline reinforcement learning.  
 268 *Advances in neural information processing systems*, 34:20132–20145, 2021.
- 269 [6] Divyansh Garg, Shuvam Chakraborty, Chris Cundy, Jiaming Song, and Stefano Ermon. Iq-learn:  
 270 Inverse soft-q learning for imitation. *Advances in Neural Information Processing Systems*, 34:  
 271 4028–4039, 2021.

<sup>7</sup><https://github.com/KAIST-AILab/imitation-dice>

<sup>8</sup><https://github.com/JasonMa2016/SMODICE>

- 272 [7] Adam Gleave, Mohammad Taufeque, Juan Rocamonde, Erik Jenner, Steven H. Wang, Sam  
273 Toyer, Maximilian Ernestus, Nora Belrose, Scott Emmons, and Stuart Russell. imitation: Clean  
274 imitation learning implementations, 2022.
- 275 [8] Jonathan Ho and Stefano Ermon. Generative adversarial imitation learning. *Advances in neural*  
276 *information processing systems*, 29, 2016.
- 277 [9] Geon-Hyeong Kim, Seokin Seo, Jongmin Lee, Wonseok Jeon, HyeongJoo Hwang, Hongseok  
278 Yang, and Kee-Eung Kim. Demodice: Offline imitation learning with supplementary imperfect  
279 demonstrations. In *International Conference on Learning Representations*, 2022.
- 280 [10] Ilya Kostrikov, Ofir Nachum, and Jonathan Tompson. Imitation learning via off-policy distribu-  
281 tion matching. *arXiv preprint arXiv:1912.05032*, 2019.
- 282 [11] Fangchen Liu, Zhan Ling, Tongzhou Mu, and Hao Su. State alignment-based imitation learning.  
283 *arXiv preprint arXiv:1911.10947*, 2019.
- 284 [12] Yecheng Jason Ma, Andrew Shen, Dinesh Jayaraman, and Osbert Bastani. Smodice: Versatile  
285 offline imitation learning via state occupancy matching. *arXiv e-prints*, pages arXiv–2202,  
286 2022.
- 287 [13] Siddharth Reddy, Anca D Dragan, and Sergey Levine. Sqil: Imitation learning via reinforcement  
288 learning with sparse rewards. *arXiv preprint arXiv:1905.11108*, 2019.
- 289 [14] Faraz Torabi, Garrett Warnell, and Peter Stone. Generative adversarial imitation from observa-  
290 tion. *arXiv preprint arXiv:1807.06158*, 2018.
- 291 [15] Aaron Van Den Oord, Oriol Vinyals, et al. Neural discrete representation learning. *Advances in*  
292 *neural information processing systems*, 30, 2017.
- 293 [16] Konrad Zolna, Alexander Novikov, Ksenia Konyushkova, Caglar Gulcehre, Ziyu Wang, Yusuf  
294 Aytar, Misha Denil, Nando de Freitas, and Scott Reed. Offline learning from demonstrations  
295 and unlabeled experience. *arXiv preprint arXiv:2011.13885*, 2020.
